# Supplementary material for: Facile fabrication of eugenol-containing polysiloxane films with good optical properties and excellent thermal stabilityviaSi–H chemistry
Source: Royal Society of Chemistry journal article supplement (doi:10.1039/d0tc05279e), 2021-01-01
Supplement: d0tc05279e1.pdf [file d0tc05279e1.pdf]

## Electronic Supporting Information (ESI)

### Facile Fabrication of Eugenol-containing Polysiloxane Films with Good Optical Properties and Superb Thermal Stability via Si–H Chemistry

Minghao Yi,<sup>a,b,c</sup> Xunjun Chen,<sup>\*a,d</sup> Peter S. Shuttleworth,<sup>\*b</sup> Lewen Tan,<sup>a</sup> Yunqing Ruan,<sup>a</sup> Yixin Xu,<sup>a</sup> Jiefeng Zheng,<sup>e</sup> Shufang Wu,<sup>a</sup> Sen Hu,<sup>a</sup> Simin Xie,<sup>a</sup> Zhixing Guan,<sup>a</sup> Guoqiang Yin<sup>a,d</sup> and Yingde Cui<sup>f</sup>

<sup>a</sup>College of Chemistry and Chemical Engineering, Zhongkai University of Agriculture and Engineering, Guangzhou 510220, China. Email: chenxj@zhku.edu.cn.

<sup>b</sup>Departamento de Física de Polímeros, Elastómeros y Aplicaciones Energéticas, Instituto de Ciencia y Tecnología de Polímeros (ICTP–CSIC), Madrid, Spain. Email: peter@ictp.csic.es.

<sup>c</sup>Departamento de Química Física Aplicada, Facultad de Ciencias, Universidad Autónoma de Madrid, 28049 Madrid, Spain.

<sup>d</sup>Guangzhou key Laboratory for Efficient Utilization of Agricultural Chemicals, Guangzhou 510225, China.

<sup>e</sup>College of Chemistry and Materials, Jinan University, Guangzhou 510632, China.

<sup>f</sup>Guangzhou Vocational College of Science and Technology, Guangzhou, China.

\* Corresponding authors.

#### Abstract

This supplementary file would help the researchers to understand this research work better. There are various datum that can be seen as following.

1. The specific output image of the density functional theory (DFT) calculation of Eugenol
2. The resultant eugenol-containing polysiloxane prepared via Hydrosilylation-PR process, accompanied by foam structure and yellow discoloration.

3. FTIR-ATR spectra of the eugenol-containing polysiloxane films and the starting Eugenol.
4. The extinction coefficient of the eugenol-containing polysiloxane films.
5. The Gel permeation chromatography (GPC) result of the Sequence 1 polymer prepared using 1.6 PMHS and eugenol at the optimal condition. The GPC measurement was carried out on a Waters 1525/2414 chromatograph (WATERS Co., Milford, MA, USA) in a linear column eluted with tetrahydrofuran at a flow rate of 1.0 mL min<sup>-1</sup>.
6. The results of water contact angle measurement.

## Data

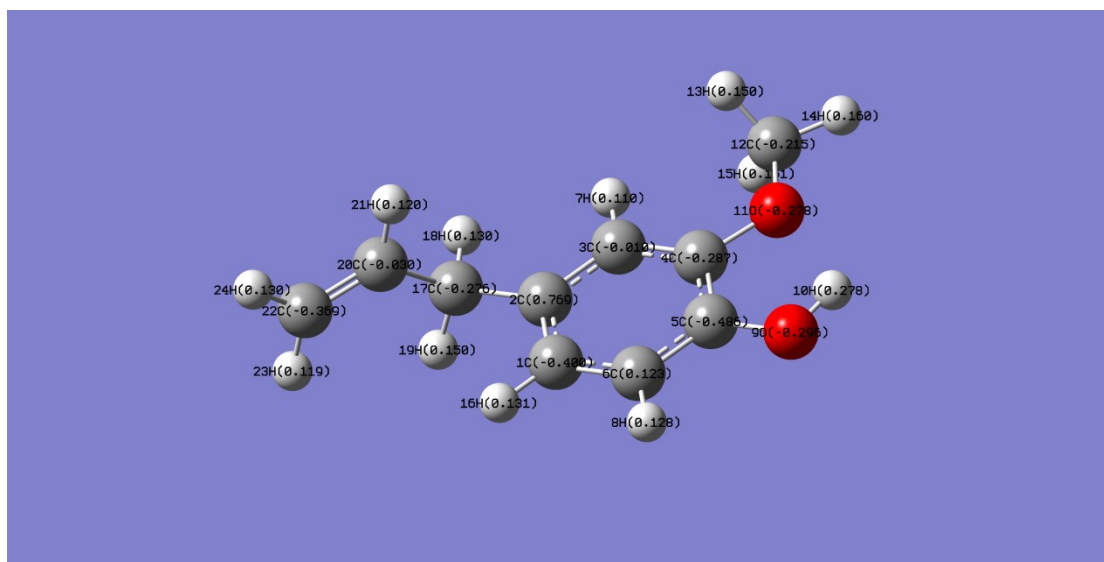

**Figure S1.** The optimized result of Eugenol

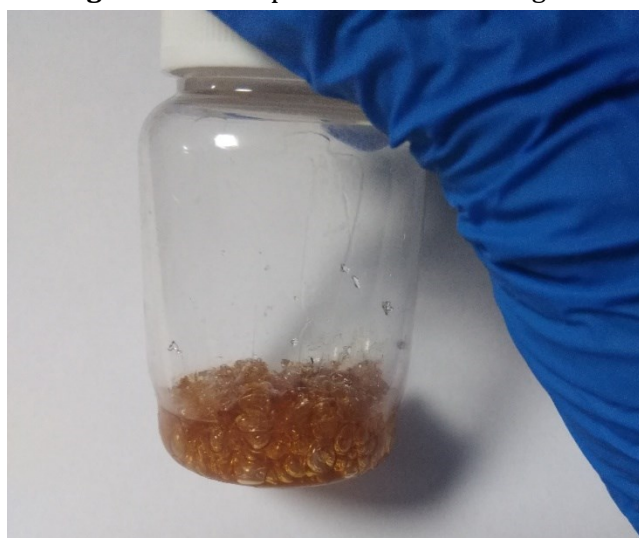

**Figure S2.** The eugenol-containing polysiloxane prepared by Hydrosilylation-PR process.

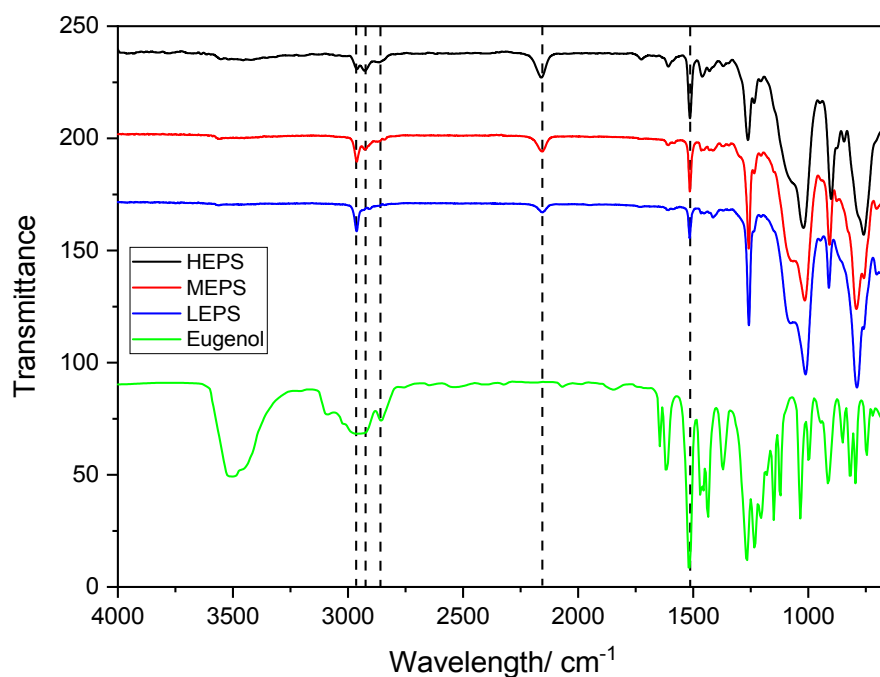

**Figure S3.** FTIR-ATR spectra of the eugenol-containing polysiloxane films and the starting Eugenol. The FTIR spectrum of Eugenol was obtained from the NIST Standard Reference Data.

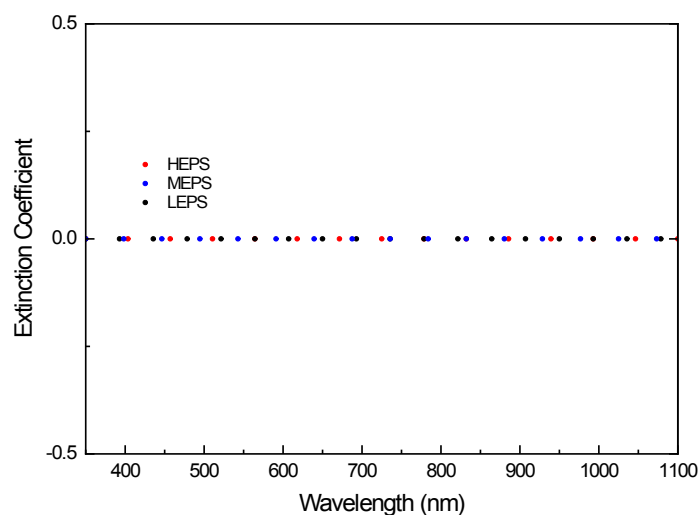

**Figure S4.** The extinction coefficient of the eugenol-containing polysiloxane films.

**Table S1.** The GPC result of the Sequence 1 polymer prepared using 1.6PMHS and eugenol at the optimal condition of 25 °C, 0.1 mmol L<sup>-1</sup> B(C<sub>6</sub>F<sub>5</sub>)<sub>3</sub> concentration and 35 wt% reactants concentration.

|   | Distribution Name | Mn (Daltons) | Mw (Daltons) | MP (Daltons) | Mz (Daltons) | Mz+1 (Daltons) | Polydispersity | Mz/Mw    | Mz+1/Mw  |
|---|-------------------|--------------|--------------|--------------|--------------|----------------|----------------|----------|----------|
| 1 |                   | 2975         | 13605        | 10279        | 38040        | 63158          | 4.572888       | 2.796074 | 4.642416 |

**Table S2.** The result of water contact angle measurement

| Sample | 1 <sup>st</sup> Test |         | 2 <sup>nd</sup> Test |         | 3 <sup>rd</sup> Test |         | Average |
|--------|----------------------|---------|----------------------|---------|----------------------|---------|---------|
|        | Left                 | Right   | Left                 | Right   | Left                 | Right   |         |
| HEPS   | 107.78°              | 108.58° | 107.57°              | 108.46° | 108.08°              | 109.09° | 108.26° |
| MEPS   | 106.75°              | 106.22° | 106.96°              | 106.33° | 106.67°              | 106.1°  | 106.51° |
| LEPS   | 93.82°               | 94.11°  | 94.75°               | 94.88°  | 94.80°               | 94.97°  | 94.56°  |
